# Supplementary material for: Detection of a conserved bacterial symbiosis in non-frugivorous Australian fruit flies (Diptera, Tephritidae, Tephritinae) supports its widespread association
Source: Research Square preprint supplement (doi:10.21203/rs.3.rs-7808998/v1), 2025-10-28

**Supplementary Information**

**Table S1** List of the reference sequences from GenBank used in insect and symbiont analyses. GenBank accession numbers for mitochondrial host (partial 16S rRNA and COI-tRNA-COII region) and symbiont (16s rRNA) gene sequences and corresponding references.

| **Taxon**  **Insect** |  | **GenBank accession no** | | **Reference** |
| --- | --- | --- | --- | --- |
| **haplotype** | **COI-tRNA-COII** | **16S rRNA** |
| *Trupanea denotata* |  | KM079225 | KM079202 | Viale *et al.,* 2015 |
| *Trupanea swezey* | a  b | KM079236  KM079235 | KM079215  KM079214 | Viale *et al.,* 2015 |
| *Phaeogramma* sp. |  | KM079217 | KM079194 | Viale *et al.,* 2015 |
| *Phaeogramma vittipennis* |  | KM079218 | KM079195 | Viale *et al.,* 2015 |
| *Trupanea crassipes* | a  b | KM079222  KM079223 | KM079199  KM079200 | Viale *et al.,* 2015 |
| *Trupanea artemisiae* |  | KM079221 | KM079197 | Viale *et al.,* 2015 |
| *Trupanea arboreae* |  | KM079219 | KM079196 | Viale *et al.,* 2015 |
| *Trupanea cratericola* |  | KM079224 | KM079201 | Viale *et al.,* 2015 |
| *Trupanea beardsleyi* |  | KM079238 | KM079198 | Viale *et al.,* 2015 |
| *Trupanea dubautiae* | a  b  c | KM079226  KM079227  KM079228 | KM079204  KM079205  KM079206 | Viale *et al.,* 2015 |
| *Trupanea joycey* | a  b  c | KM079229  KM079230  KM079231 | KM079207  KM079208  KM079209 | Viale *et al.,* 2015 |
| *Trupanea* sp*. waikamoi* |  | KM079237 | KM079216 | Viale *et al.,* 2015 |
| *Trupanea perkinsi* |  | KM079233 | KM079212 | Viale *et al.,* 2015 |
| *Trupanea pantosticta* |  | KM079232 | KM079210 | Viale *et al.,* 2015 |
| *Trupanea* sp. *pohakuloa* |  | KM079234 | KM079213 | Viale *et al.,* 2015 |
| *Trupanea stellata* |  | GQ175797 | GQ175862 | Mazzon *et al.,* 2010 |
| *Tephritis arnicae* |  | GQ175793 | GQ175830 | Mazzon *et al.,* 2010 |
| *Trupanea amoena* |  | GQ175796 | GQ175833 | Mazzon *et al.,* 2010 |
| *Achanthiophilus helianthi* |  | GQ175795 | GQ175832 | Mazzon *et al.,* 2010 |
| *Capitites ramulosa* |  | GQ175803 | GQ175840 | Mazzon *et al.,* 2010 |
| *Tephritis divisa* |  | GQ175790 | GQ175827 | Mazzon *et al.,* 2010 |
| *Tephritis matricariae* |  | GQ175791 | GQ175828 | Mazzon *et al.,* 2010 |
| *Tephritis cometa* |  | GQ175792 | GQ175829 | Mazzon *et al.,* 2010 |
| *Tephritis bardaneae* |  | GQ175794 | GQ175831 | Mazzon *et al.,* 2010 |
| *Oxyna flavipennis* |  | GQ175798 | GQ175835 | Mazzon *et al.,* 2010 |
| *Campiglossa guttella* |  | GQ175801 | GQ175838 | Mazzon *et al.,* 2010 |
| *Campiglossa doronici* |  | GQ175802 | GQ175839 | Mazzon *et al.,* 2010 |
| *Campiglossa (=Dioxyna) bidentis* |  | GQ175800 | GQ175837 | Mazzon *et al.,* 2010 |
| *Sphenella marginata* |  | GQ175799 | GQ175836 | Mazzon *et al.,* 2010 |
| *Bactrocera oleae* |  | GQ175825 | GQ175862 | Mazzon *et al.,* 2010 |
| ***Symbiotic bacteria*** |  | **16S rRNA** | |  |
| *Stammerula* sp.of *T. artemisiae* |  | KM079242 | | Viale *et al.,* 2015 |
| *Stammerula* sp*.* of *T. perkinsi* |  | KM079255 | | Viale *et al.,* 2015 |
| *Stammerula* sp. of *T. joycey* |  | KM079251; KM079252; KM079250 | | Viale *et al.,* 2015 |
| *Stammerula* sp. of *T. pantosticta* |  | KM079253; KM079254 | | Viale *et al.,* 2015 |
| *Stammerula* sp. of *T. pohakuloa* |  | KM079256 | | Viale *et al.,* 2015 |
| *Stammerula* sp. of *T. waikamoi* |  | KM079259 | | Viale *et al.,* 2015 |
| *Stammerula* sp. of *Phaenogramma “*sp. nov.*”* |  | KM079239 | | Viale *et al.,* 2015 |
| *Stammerula* sp. of *P. vittipennis* |  | KM079240 | | Viale *et al.,* 2015 |
| *Stammerula* sp. of *T. dubautiae* |  | KM079248; KM079247; KM079249 | | Viale *et al.,* 2015 |
| *Stammerula* sp. of *T. arboreae* |  | KM079241 | | Viale *et al.,* 2015 |
| *Stammerula* sp. of *T. cratericola* |  | KM079245 | | Viale *et al.,* 2015 |
| *Stammerula* sp. of *T. beardsleyi* |  | KM079243 | | Viale *et al.,* 2015 |
| *Stammerula* sp. of *T. crassipes* |  | KM079244 | | Viale *et al.,* 2015 |
| *Stammerula* sp. of *T. denotata* |  | KM079246 | | Viale *et al.,* 2015 |
| *Stammerula* sp. of *T. swezeyi* |  | KM079257; KM079258 | | Viale *et al.,* 2015 |
| *Stammerula* sp. of *T. amoena* |  | EF469626 | | Mazzon *et al.,* 2008 |
| *Stammerula* sp. of *T. stellata* |  | EF469627 | | Mazzon *et al.,* 2008 |
| *Stammerula* sp. of *C. ramulosa* |  | EF469628 | | Mazzon *et al.,* 2008 |
| *Stammerula* sp. of *A. helianthi* |  | EF469625 | | Mazzon *et al.,* 2008 |
| *Stammerula* sp. of *S. marginata* |  | EF469629 | | Mazzon *et al.,* 2008 |
| *Stammerula tephritidis* of *T. bardanae* |  | EF469617 | | Mazzon *et al.,* 2008 |
| *Stammerula tephritidis* of *T. arnicae* |  | EF469616 | | Mazzon *et al.,* 2008 |
| *Stammerula tephritidis* of *T. cometa* |  | EF469615 | | Mazzon *et al.,* 2008 |
| *Stammerula tephritidis* of *T. divisa* |  | EF469619 | | Mazzon *et al.,* 2008 |
| *Stammerula tephritidis* of *T. matricariae* |  | EF469623 | | Mazzon *et al.,* 2008 |
| *Stammerula* sp. of *Oxyna flavipennis* |  | EF469630 | | Mazzon *et al.,* 2008 |
| *Stammerula* sp. of *Campiglossa doronici* |  | EF469636 | | Mazzon *et al.,* 2008 |
| *Erwinia persicina* |  | AM184098 | | Randazzo *et al.,* 2009 |
| Symb. of *Campiglossa guttella* |  | EF469637 | | Mazzon *et al.,* 2008 |
| *Erwinia dacicola* of *Bactrocera oleae* |  | AJ586620 | | Capuzzo *et al.,* 2005 |
| Symb. of *Dioxyna bidentis* |  | EF469631 | | Mazzon *et al.,* 2008 |
| Symb. of *Noeeta pupillata* | A  C | EF469633  EF469635 | | Mazzon *et al.,* 2008 |
| Symb. of *Noeeta bisetosa* |  | EF469632 | | Mazzon *et al.,* 2008 |
| *Klebsiella oxytocina* |  | DQ444288 | | Hao *et al.,* 2008 |

**Fig. S1** Phylogenetic placement of Tephritini (in bold) from Australia and several Tephritini species from Europe and Hawaii obtained by Maximum Likelihood (ML) analyses of the concatenated mitochondrial data set (partial 16S rRNA gene and COI-tRNA-COII region).


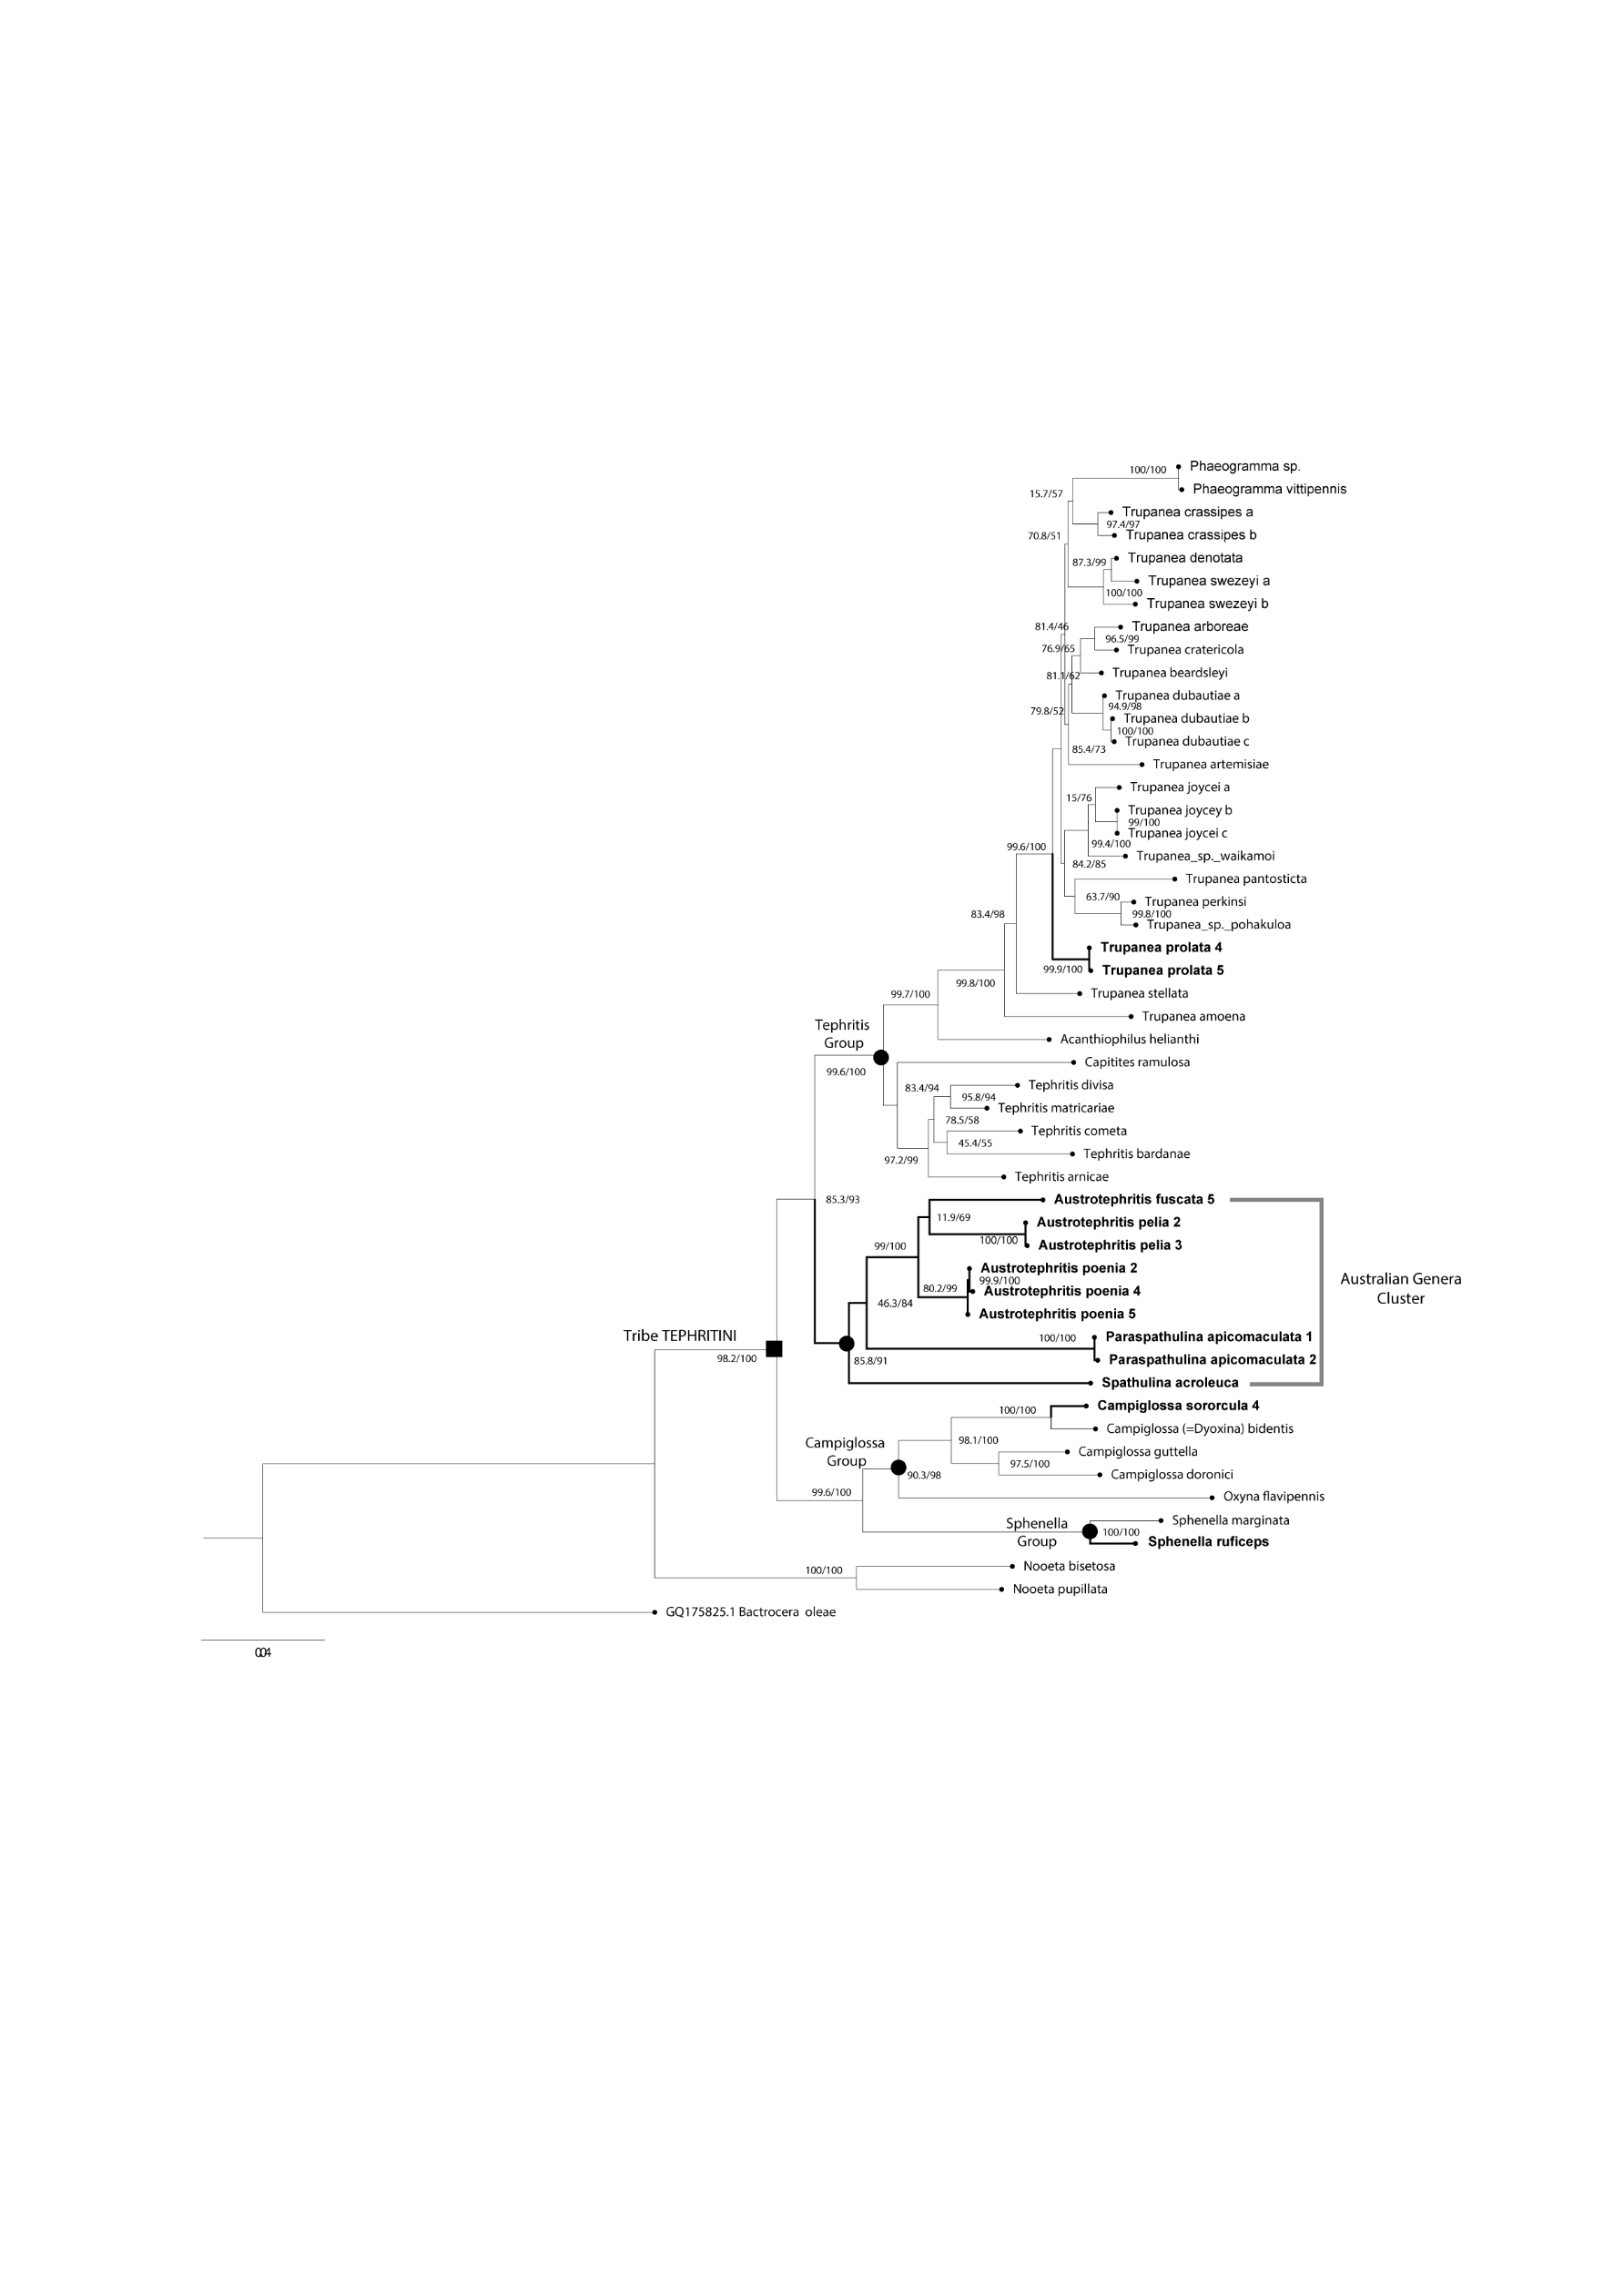


**Fig. S2** A plot showing that the total cost of events is significantly different compared with the distribution of costs in hosts-associated symbionts (Setting 2).


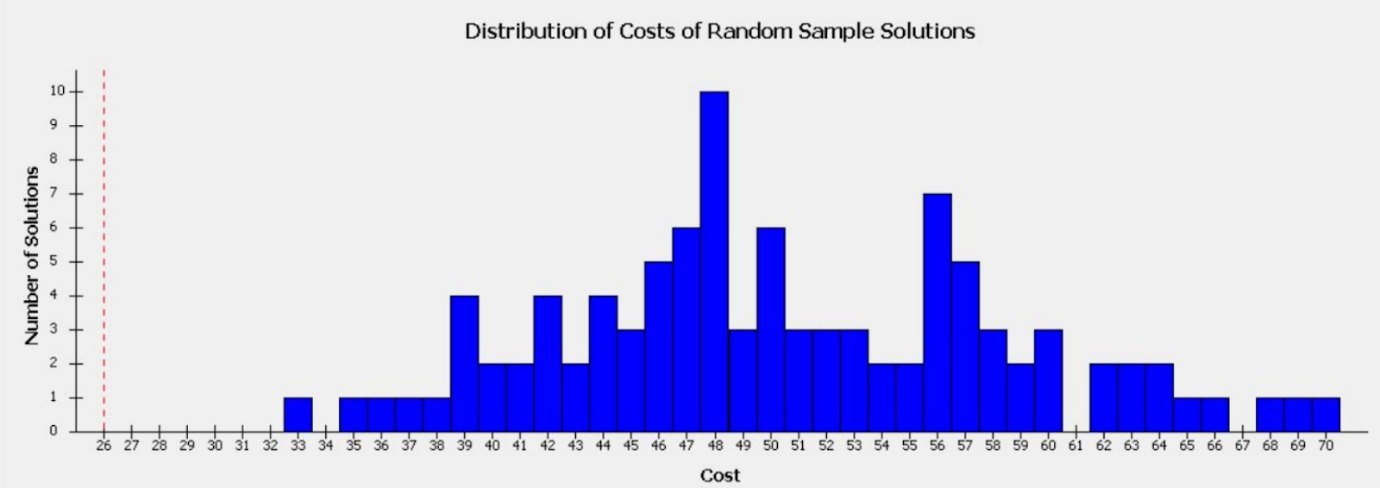


**Fig. S3** Cophylogeny of tephritini and bacterial symbionts from Jane at the species level. Blue and black lines indicate the phylogenies of symbionts and host flies, respectively. Arrows indicate host switch events; hollow red circles indicate cospeciation events; solid yellow circles indicate duplications. A) Settings 1; B) Settings 2.

A
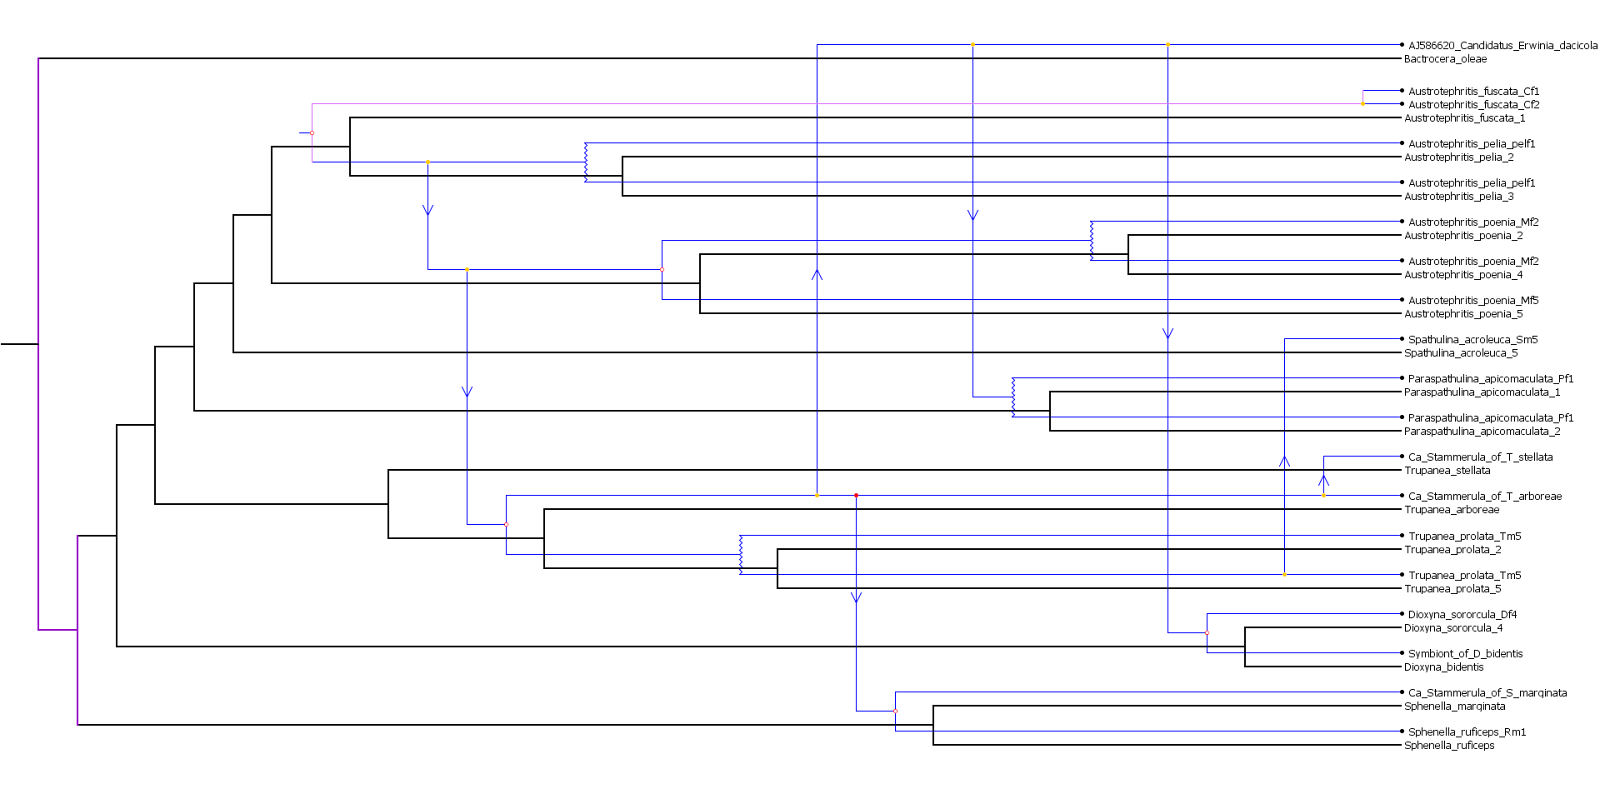


B
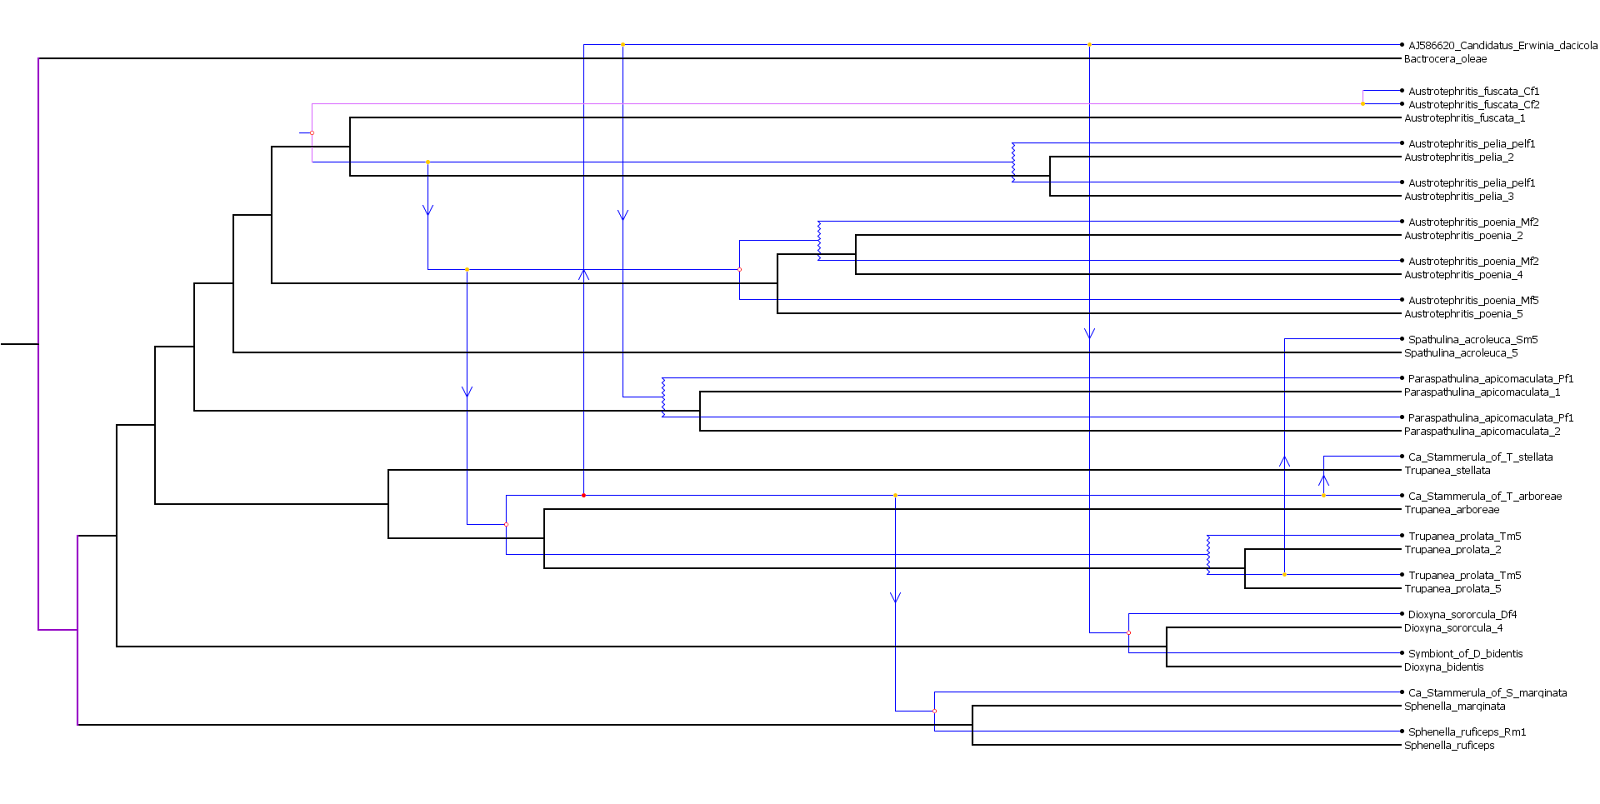

Supplement: Supplementary file 1 [file eebabe35ac42cfd6e522ed03.docx]
